# Supplementary material
Source: publisher figshare collection journal article supplement (https://acs.figshare.com/ndownloader/files/4578538)
Supplement: Supplementary file 1 [file 4578538]

**Supporting Information:**

**Polypyrrole coated SnO<sub>2</sub> hollow spheres and their  
application for ammonia sensor**

*Jun Zhang, Shurong Wang, Mijuan Xu, Yan Wang, Huijuan Xia, Shoumin Zhang,*

*Xianzhi Guo, and Shihua Wu\**

Department of Chemistry, Nankai University, Tianjin 300071, China

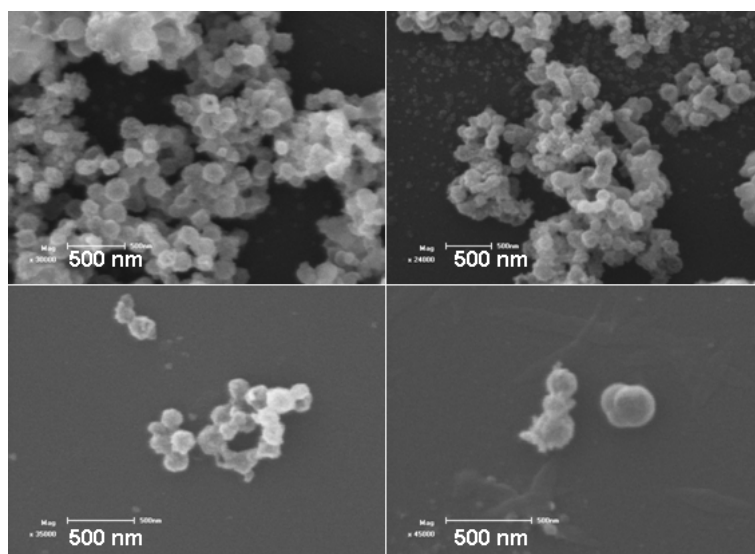

**Figure S1.** SEM images of the polypyrrole coated SnO<sub>2</sub> hollow spheres.

---

\*Corresponding author. Tel: +86 22 2350 5896. E-mail: wushh@nankai.edu.cn.
